# Supplementary material
Source: PubMed Central journal article supplement (PMC3702384)
Supplement: NIHMS486696-supplement-supplement_1.pdf [file NIHMS486696-supplement-supplement_1.pdf]

SUPPLEMENTARY ONLINE DATA

***Aedes aegypti* cadherin serves as a putative receptor of the Cry11Aa toxin from *Bacillus thuringiensis* subsp. *israelensis***

Jianwu CHEN\*, Karlygash G. AIMANOVA\*, Luisa E. FERNANDEZ†, Alejandra BRAVO†, Mario SOBERON† and Sarjeet S. GILL\*<sup>1</sup>

\*Department of Cell Biology and Neuroscience, University of California Riverside, Riverside, CA 92521, U.S.A., and †Instituto de Biotecnología, Universidad Nacional Autónoma de México, Apdo. postal 510-3, Cuernavaca 62250, Morelos, Mexico

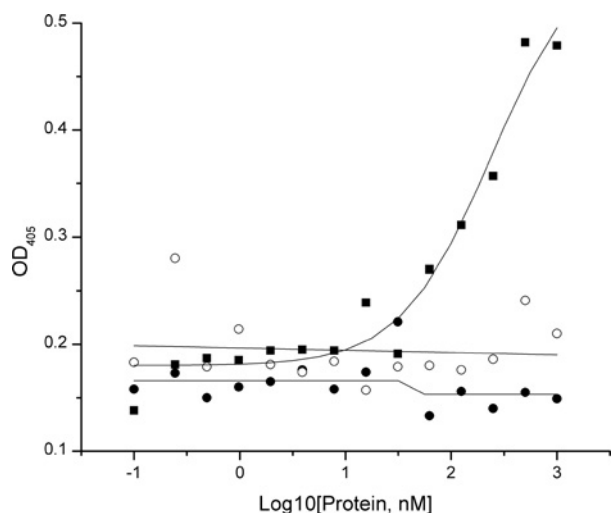

**Figure S1 Cry11Aa toxin binds partial cadherin fragment G10, but not G7 and C13**

G10 (■) shows dose-dependent binding to coated Cry11A (0.4 μg), but G7 (●) and C13 (○) do not. These bound partial cadherin fragments were detected with anti-His antibody and ALP-conjugated anti-mouse secondary antibody. OD<sub>405</sub>, A<sub>405</sub>.

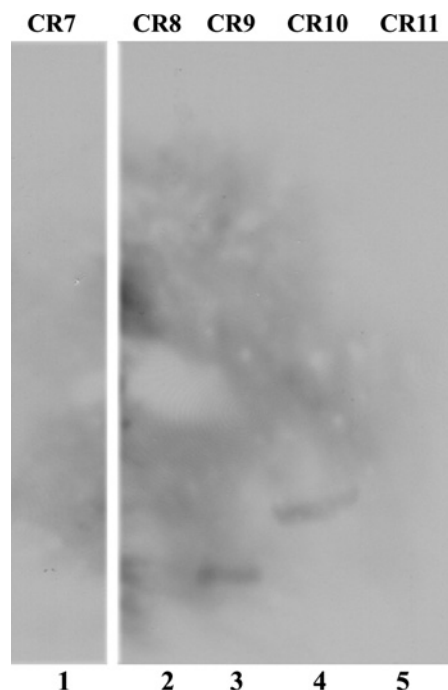

**Figure S2 Cry11Aa toxin binds cadherin fragments by toxin overlay assay**

*Aedes* cadherin repeats, CR7–CR11 (90 pmol of each), were separated on SDS/PAGE (8% gel). These fragments were then electrotfered to a PVDF membrane, which was incubated with 20 nM Cry11Aa toxin. Unbound toxin was removed by washing, the membrane incubated with anti-Cry11Aa antiserum (1:2000) and then visualized by luminol (lanes 1–5).

Received 11 May 2009/18 August 2009; accepted 4 September 2009  
Published as BJ Immediate Publication 4 September 2009, doi:10.1042/BJ20090730

<sup>1</sup> To whom correspondence should be addressed (email sarjeet.gill@ucr.edu).
